# Supplementary material for: Microwave-assisted green synthesis of some nanoconjugated copolymers: characterisation and fluorescence quenching studies with bovine serum albumin
Source: Royal Society of Chemistry journal article supplement (doi:10.1039/c5nj02513c), 2016-01-01

12/18/2015 19:02:45 1 / 3

## Characterisation & Measurement Laboratory SHIMADZU-GPC Analysis Report

D:\CECRI-GPC\External\Dec 15\Sapana Jadouh\2.lcd

|                  |                                           |
|------------------|-------------------------------------------|
| Acquired by      | : Dr.M.G.Neelavannan                      |
| Indenter Name    | : Sapana Jaouh                            |
| Sample ID        | : pan popd pans                           |
| Injection Volume | : 20 uL                                   |
| Data File Name   | : 2.lcd                                   |
| Method File Name | : polystyrene method Mw 160- Mw 96000.lcm |
| Data Acquired    | : 12/18/2015 5:11:50 PM                   |
| Data Processed   | : 12/18/2015 5:46:51 PM                   |
| Analysed by :    | nmp 10u Columns                           |

### <Chromatogram>

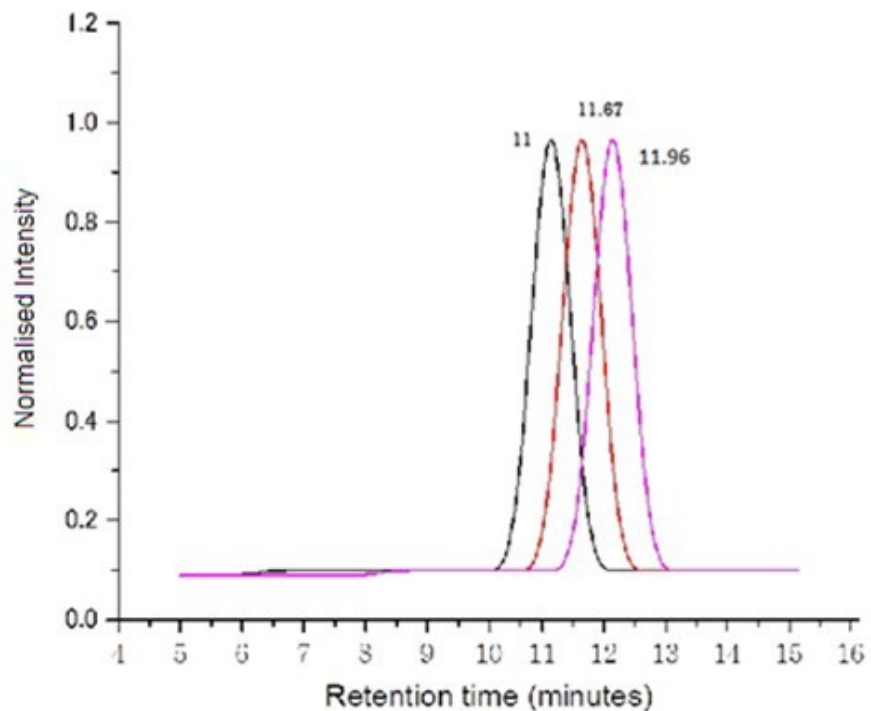

Supplement: c5nj02513c1.pdf [file c5nj02513c1.pdf]
