# Supplementary material for: Microwave-assisted green synthesis of some nanoconjugated copolymers: characterisation and fluorescence quenching studies with bovine serum albumin
Source: Royal Society of Chemistry journal article supplement (doi:10.1039/c5nj02513c), 2016-01-01

2/18/2015 19:04:28 1 / 4

## Characterisation & Measurement Laboratory SHIMADZU-GPC Analysis Report

D:\CECRI-GPC\External\Dec 15\Sapana Jadouh\3.lcd  
Acquired by : Dr.M.G.Neelavannan  
Indenter Name : Sapana Jaouh  
Sample ID : popd  
Injection Volume : 20 uL  
Data File Name : 3.lcd  
Method File Name : polystyrene method Mw 160- Mw 96000.lcm  
Data Acquired : 12/18/2015 5:58:21 PM  
Data Processed : 12/18/2015 6:33:23 PM  
Analysed by : nmp 10u Columns

### <Chromatogram>

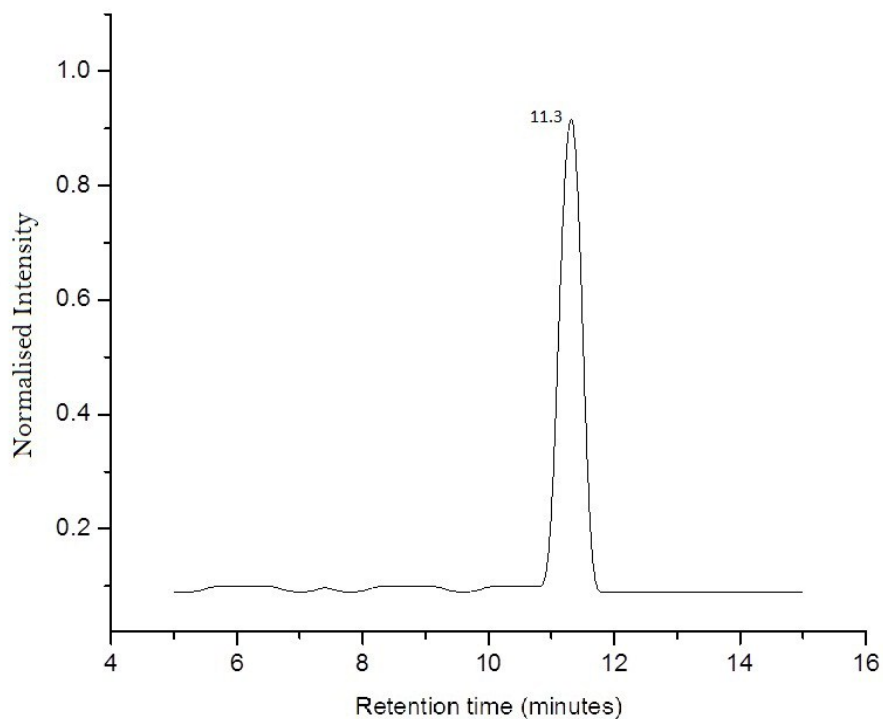

Supplement: c5nj02513c2.pdf [file c5nj02513c2.pdf]
